1 **Validation and Performance Comparison of Three SARS-CoV-2 Antibody Assays**

2

3 <sup>1</sup>Kimberly J Paiva, <sup>1</sup>Ricky D Grisson MD MBA MPH, <sup>2</sup>Philip A Chan MD, <sup>2</sup>John R. Lonks MD, <sup>3</sup>Ewa  
4 King PhD, <sup>3</sup>Richard C Huard PhD D(ABMM) FCCM, <sup>1</sup>Diane L Pytel-Parenteau, <sup>1</sup>Ga Hie Nam MD,  
5 <sup>1</sup>Evgeny Yakirevich MD DSc, <sup>1</sup>Shaolei Lu MD PhD

6

7 <sup>1</sup>Department of Pathology and Laboratory Medicine, <sup>2</sup>Department of Infectious Diseases,  
8 Warren Alpert Medical School of Brown University, Providence, Rhode Island

9 <sup>3</sup>Rhode Island State Laboratory, Rhode Island Department of Health, Providence, Rhode Island

10

11 Corresponding author:

12 Shaolei Lu, MD PhD

13 APC12-121

14 593 Eddy Street

15 Providence RI 02903

16 Email: [slu@lifespan.org](mailto:slu@lifespan.org)

17 Phone: (401) 444 7120

18

## 19 **Abstract**

20 Serology testing of severe acute respiratory syndrome coronavirus 2 (SARS-CoV-2) is  
21 increasingly being used during the current pandemic of Coronavirus Disease 2019 (COVID-19).  
22 The clinical and epidemiologic utilities of antibody-based SARS-CoV-2 testing are under debate.  
23 Characterizing these assays helps to understand the disease and provides scientific basis for  
24 deciding how to best use these assays. The study assessed one chemiluminescent assay (Abbott  
25 COVID-2 IgG) and two lateral flow assays (STANDARD Q [SQ] IgM/IgG Duo and Wondfo Total  
26 Antibody Test). Validation included 113 blood samples from 71 PCR-confirmed COVID-19  
27 patients and 1182 samples from negative controls with potential interferences/cross-reactions,  
28 including 1063 pre-pandemic samples. IgM antibodies against SARS-CoV-2 were detected as  
29 early as post-symptom onset days 3-4. IgG antibodies were first detected post-onset days 5-6  
30 by SQ assays. The detection rates increased gradually, and SQ IgG, Abbott IgG and Wondfo  
31 Total detected antibodies from all the PCR-confirmed patients 14 days after symptom onset.  
32 Overall agreements between SQ IgM/IgG and Wondfo Total was 88.5% and between SQ IgG  
33 and Abbott IgG was 94.6% (Kappa = 0.75, 0.89). No cross-reaction with other endemic  
34 coronavirus infections were identified. Viral hepatitis and autoimmune samples were the main  
35 cross-reactions observed. However, the interferences/cross-reactions were low. The  
36 specificities were 100% for SQ IgG and Wondfo Total and 99.62% for Abbott IgG and 98.87% for  
37 SQ IgM. These findings demonstrate high sensitivity and specificity of appropriately validated  
38 antibody-based SARS-CoV-2 assays with implications for clinical use and epidemiological  
39 seroprevalence studies.

## 40 **Introduction**

41

42           There is an ongoing worldwide pandemic caused by a novel coronavirus, now known as  
43 SARS-CoV-2. The virus was first reported in Wuhan, Hubei Province of China in 2019.  
44 Coronavirus Disease 2019 (COVID-19), the disease caused by SARS-CoV-2, has greatly impacted  
45 many countries, most especially the United States. There are currently over 5 million confirmed  
46 cases worldwide, with over 1.6 million patients in the United States  
47 (<https://coronavirus.jhu.edu/map.html>). Evaluating the spread and transmission of SARS-Cov-2  
48 is critical in addressing the pandemic.

49           Development of diagnostic methods for COVID-19 started with SARS-CoV-2 viral  
50 genome sequencing first shared by a group of Chinese scientists (1). Real-time reverse  
51 transcriptase-polymerase chain reaction (rRT-PCR) based methods have been the mainstay as a  
52 diagnostic approach. Most tests use the nasopharyngeal and/or oropharyngeal swabs to obtain  
53 the virus before running rRT-PCR. However, it was quickly discovered that the detection rates of  
54 pharyngeal and nasal swabs were only 32% and 63%, respectively, and their detection rates  
55 decreased as the disease progressed (2). First-time positive rate by pharyngeal swab rRT-PCR  
56 was reported as low as 37% in 610 hospitalized patients (3).

57           While rRT-PCR-based testing is the main tool for clinical diagnosis, antibody-based  
58 testing has gained considerable attention. Studies suggested that IgM antibody might develop  
59 as early as five days after onset of symptoms (4) and IgG developed later at a median time of 14  
60 days (4, 5). The sensitivities of these tests reportedly varies widely from as low as 11% early in  
61 infection (6) to as high as 100% after 14 days (5). It has been shown that diagnosis of COVID-19

62 could potentially be improved by using both PCR-based and antibody-based tests (5). However,  
63 the most important use of antibody-based tests is seroprevalence studies for use in modeling  
64 methods and understanding how SARS-CoV-2 has spread across different populations.

65 Many antibody-based SARS-CoV-2 tests are currently available or in development.  
66 Antibodies to the Spike protein (S-protein), receptor binding domain (in S-protein) and  
67 nucleocapsid protein (N-protein) are the main targets of these assays. It has been  
68 demonstrated that N-protein-based antibody tests were more sensitive than antibody tests  
69 targeting S-proteins (7). The majority of the assays on the markets are  
70 immunochromatographic assays using a lateral flow format. Lateral flow assays use venous  
71 blood or capillary blood and they are a manual test that are quick and easy to perform,  
72 independent of larger immunochemical instruments. The majority of tests detect IgM and IgG  
73 separately while some detect total antibodies (IgM and IgG). Positive results demonstrate a  
74 visible band with various degrees of intensity in a designated zone. Chemiluminescent tests are  
75 considered the most sensitive by methodology and provided results with great accuracy and  
76 precision. These tests are commonly quick and randomly accessible on immunochemical  
77 analyzers. The current study looks to the performance of two lateral flow assays and one  
78 chemiluminescent assay testing for SARS-CoV-2 antibodies.

79

## 80 **Methods**

81

82           The study was approved by the Institutional Review Board (IRB) of Lifespan Health  
83 System (including Rhode Island Hospital and The Miriam Hospital) to ensure the study met the  
84 ethical requirements.

85

## 86 Patients

87           A total of 113 remnant/discarded serum or plasma samples were collected from March  
88 to April in 2020 from the Clinical Immunology Lab at a major academic pathology department in  
89 Rhode Island. These samples were collected from 71 COVID-19 patients confirmed by rRT-PCR  
90 tests on nasopharyngeal swabs. An additional 126 samples were collected from healthy  
91 individuals in early March. 119 samples that were positive for antibodies against viruses and  
92 other pathogens were used to test cross-reaction of the assays (Table3). Additional samples  
93 were collected consisting of interference antibodies such as Rheumatoid factor (RF), anti-  
94 double strand DNA (ds-DNA), anti-nuclear antibody (ANA) and paraprotein IgM and IgG (Table  
95 3). Blood samples from patients testing positive for upper respiratory viruses were obtained  
96 when a viral respiratory pathogen nucleic acid test was performed (ePlex Respiratory Pathogen  
97 Panel, GenMark, Carlsbad, CA), or up to 53 days after the diagnoses. The same upper  
98 respiratory virus tests were routinely ordered for all the COVID-19 patients. The tests were  
99 performed following manufacturer's protocol.

100           Of all the 113 samples available from the 71 patients, 105 samples were selected to  
101 evaluate antibody positive rates every two days (1-2, 3-4, 5-6, 7-8, 9-10, 11-12, 13-14, and  $\geq 15$

102 days post symptom onset). Duplicate samples in the same time frame were not used.  
103 Seroconversion date was defined as the middle point between the date of the last negative and  
104 the date of the first positive in one patient.

105 To obtain more precise specificities for SQ IgM, SQ IgG and Abbott IgG, 1063 serum or  
106 plasma samples were collected before the pandemic started in the United States (January  
107 2020), including 500 samples originally for reference range determination of a troponin assay,  
108 371 prenatal samples for reference range determination of quadruple tests, 50 pre-pandemic  
109 samples from transfusion service and 21 pre-pandemic plasma segments from the Rhode Island  
110 Blood Center.

111 Not all the samples were available for all four tests. Case numbers in the tables and  
112 figures may have small difference (up to 4); however, the results and conclusions were not  
113 compromised.

114

#### 115 Lateral flow assays

116 SARS-CoV-2 Total Antibody Test (Wondfo, Guangzhou, China) and STANDARD Q COVID-  
117 19 IgM/IgG Duo Test kits (SD Biosensor, Gyeonggi-do, Korea) were purchased from the  
118 manufacturers and the assays were performed following the manufacturer's protocols (8, 9).  
119 Briefly, 10 µl of serum or plasma was applied to the designated area of the lateral flow strip  
120 following three drops of buffer. Positive result was indicated by a visible band in the designated  
121 area accompanied with an appropriate control band. Over 90% of the reading was performed  
122 by one investigator (K.J.P.) to ensure consistency.

123

124 Chemiluminescent assay

125 SARS-CoV-2 IgG test reagents were purchased from the manufacturer (Abbott  
126 Diagnostics, Lake Forest, IL). The assays were performed on an Abbott Architect i1000 analyzer  
127 following the manufacturer's protocol. The assay was calibrated initially and with any  
128 subsequent reagent lot. A positive and negative Control was run at the start of each batch of  
129 antibody testing per manufacturers protocol (10). Serum and plasma samples were both  
130 accepted by the assay. Samples with signal-to-cutoff (S/CO) ratio greater than or equal to 1.4  
131 were considered positive.

132

133 Data analysis

134 The data collected were analyzed on a statistical package, JMP Pro 14.0 (SAS Institute,  
135 Cary, NC). Categorical data were analyzed via Chi-square analysis or Fisher's exact test  
136 whenever appropriate. Wilcoxon method was used in parametric test. 95% confidence intervals  
137 were calculated for the sensitivity and specificity.

## 138 **Results**

### 139 Clinicopathologic features of COVID-19 patients in the study

140 Table 1 summarizes the clinicopathologic features of 71 PCR-confirmed COVID-19  
141 patients in this series, including 42 males and 29 females. Average age of the males was 8.1  
142 years younger than that of the females ( $P=0.0470$ ). About one third (38) of the patients were  
143 White or Caucasian and 31% (22) were Hispanic or Latino. Africa Americans consisted of 14%  
144 (10) of the patients. There was one Asian patient. Many of the patients were either overweight  
145 (30%) or obese (47%). Most of them 48 (68%) lived with family members, 9 (13%) in assisted  
146 facilities, 9 (13%) alone, and 5 (7%) were homeless. Forty percent (40%) of them had diabetes.  
147 Only 8 (11%) had baseline respiratory illnesses, mainly asthma and/or chronic obstructive  
148 pulmonary disease (COPD). Eight (11%) had positive findings in upper respiratory virus testing  
149 (ePlex Respiratory Pathogen Panel), including coronavirus NL63, coronavirus OC43, and  
150 rhinovirus/enterovirus, influenza A subtype H1N1, and respiratory syncytial virus A and B.  
151 Patients had decreased absolute lymphocyte count at  $0.71 \times 10^9/L$  on average when the  
152 diagnosis of COVID-19 was made. The highest D-Dimer level in the disease course was  
153 significantly higher in male patients, with median of 2180 ng/mL, compared to 431 in female  
154 patients ( $P=0.0289$ ;  $P= 0.0099$  after logarithmic transformation). Among the highest level of  
155 oxygen requirement in the disease course, 32 (45%) needed oxygen through nasal cannula, 19  
156 (27%) required intubation, 1 needed extracorporeal membrane oxygenation, and the remaining  
157 17 (26%) maintained a satisfactory oxygen saturation on room air. Seven patients died including  
158 6 males and 1 female.

159



160 Antibody detection in early disease stages by four different tests

161           The patients' blood samples were collected on average 11.2 days post-symptom onset  
162 (Table 1). The samples were grouped every two days within the first 2 weeks starting on the  
163 symptom onset day 0, and tested by SQ IgM, SQ IgG, Abbott IgG and Wondfo Total antibody  
164 assays. Positive results appeared as early as days 3-4 for SQ IgM, days 5-6 for SQ IgG, days 7-8  
165 for Abbott IgG and Wondfo Total. After 14 days, all the samples were positive by SQ IgG, Abbott  
166 IgG and Wondfo Total.

167           The time points and test results related to seroconversion are listed in Supplemental  
168 Table 1. Twenty-three events of seroconversion were recorded and summarized in Figure 2. SQ  
169 IgM recorded 7 seroconversions, dated from post-symptom onset days 5.5 to 11, 7.9 days on  
170 average. SQ IgG recorded 8 seroconversions, dated from post-symptom onset days 5.5 to 10,  
171 7.6 days on average. Abbott IgG recorded 8 seroconversions, dated from post-symptom onset  
172 days 5.5 to 10.5, 7.6 days on average. Wondfo Total Antibodies recorded 10 seroconversions,  
173 dating from 5.5 to 11 days, 8.1 days on average. There was no statistical difference among the  
174 seroconversion times of all the assays (Figure 2).

175

176 Comparison between IgG assays and IgM/IgG assays

177           The Wondfo Total Antibody test detects IgG and IgM. Either a positive IgM or a positive  
178 IgG will give a positive result. SQ IgM/IgG Duo is packaged as two independent lateral flow  
179 devices that are used to assay IgM and IgG in parallel, but their combined interpretation  
180 provides a result comparable with that of the Wondfo Total Antibody test. Out of 113 samples  
181 from PCR-confirmed patients with antibody results available from all 3 tests, 65 (58%) were

182 positive by Wondfo Total and SQ IgM/IgG and 35 (31%) were negative by all three. Six (5.3%)  
183 were positive by Wondfo and negative by SQ IgM and IgG. Seven (6.2%) were negative by  
184 Wondfo Total and positive by either of SQ IgM and IgG. The overall agreement was 88.5% and  
185 the Kappa value was 0.75. (Table 2)

186 Between SQ IgG and Abbott IgG, the overall agreement was 94.6% with a Kappa value of  
187 0.89. There were 58 (52%) samples positive by both assays and 48 (43%) negative by both. Five  
188 (4.5%) were positive by Abbott IgG and negative by SQ IgG. Of these, 4 were positive by  
189 Wondfo Total. One (1%) case was positive by SQ IgG but negative by Abbott IgG and Wondfo  
190 Total. (Table 2)

191

#### 192 Cross-reactions, interference and specificities

193 To obtain the specificities of four tests, 126 assumedly negative samples collected from  
194 routine clinical immunology samples were tested. All resulted negative except SQ IgM which  
195 had three positives. The specificities and 95% confidence intervals of SQ IgG, Abbott IgG and  
196 Wondfo Total were 100% (97.0%, 100%) for all three and 97.6% (93.2%, 99.2%) for SQ IgM  
197 based on this series. (Table 3)

198 To examine the assay's cross-reactivity to other viruses, the study included 21 samples  
199 from patients with seasonal coronavirus NL63 (n=11), HKU1 (n=7) and 229E (n=3). The  
200 diagnoses of virus infection were based on nucleic acid testing. No patients with past OC43  
201 infection were evaluated. Blood samples were collected around the diagnoses and after the  
202 diagnoses to ensure enough antibody response to be mounted. Eight samples were collected  
203 14 to 53 days after the diagnosis. All 21 samples were negative by the four tests. Similar

204 sample collection scheme was used for other viruses, including influenzas, metapneumovirus,  
205 rhinovirus, enterovirus, respiratory syncytial viruses and adenovirus. All these samples were  
206 negative by the four tests. (Table 3)

207 Selected samples with positive IgG and IgM results from other viruses including varicella  
208 zoster virus, rubella, Epstein-Barr virus, cytomegalovirus (CMV) and hepatitis viruses were also  
209 tested. SQ IgM was positive in one sample with Rubella IgG. SQ IgG was positive in one sample  
210 with CMV IgM and one sample with Hepatitis A IgG. Abbott IgG was positive in one sample with  
211 Hepatitis A IgG and one sample from an active Hepatitis B patient. Wondfo Total was positive in  
212 one sample from a patient with both active Hepatitis B and C. SQ IgM was positive in one  
213 sample with Toxoplasma IgM. None of Rapid Plasma Reagin (RPR) samples was positive by any  
214 of the tests. (Table 3)

215 SQ IgM was positive in one sample with Rheumatoid Factor (RF) and Abbott IgG was  
216 positive in one sample with RF and one sample with anti-Double Strand DNA (dsDNA). (Table 3)  
217 Samples with anti-nuclear antibodies and paraproteins of IgG and IgM types were all negative  
218 by four tests. (Table 3)

219

#### 220 False positive rates of SQ IgM, SQ IgG, and Abbott IgG in pre-pandemic samples

221 Among the 1063 blood samples from frozen pre-pandemic time, SQ IgM had 6 positives  
222 from troponin study samples, 2 from plasma segments, and one from prenatal samples. Abbott  
223 IgG had 4 positives from troponin study samples. No false positive was seen from SQ IgG results.  
224 The specificities and 95% confidence intervals (in parenthesis) for SQ IgM, SQ IgG and Abbott

225 IgG were 98.87% (98.04%, 99.35%), 100% (99.64%, 100%) and 99.62% (99.03%, 99.85%),  
226 respectively. (Table 4)  
227

## 228 Discussion

229 The utility of the COVID-19 serology testing is still subject to debate. As shown in Figure  
230 1, antibodies started to be detected 3-4 days after the symptom onset. Antibody titers  
231 continued to increase and after 2 weeks antibodies could be detected by all the tests except SQ  
232 IgM whose positive rate peaked at 87.5% around day 13-14. High sensitivity of serology testing  
233 after 2 weeks of symptom onset was shown in other studies (11, 12). In one study, 100%  
234 sensitivity was seen in Diazyme IgM/IgG assay  $\geq 15$  days post PCR diagnosis (11) and another  
235 study reported 93.8% (95% CI; 82.80-98.69) at  $\geq 14$ d post symptom onset for Abbott IgG (12).

236 Serology testing could be used as part of the diagnostic panel after 14 days post  
237 symptom onset when the positive rates were the highest and the sensitivity of swab PCR  
238 decreased (2, 3). At our institution, it is not uncommon to see patients who were highly  
239 suspected of COVID-19 based on signs and symptoms have positive antibody tests while rRT-  
240 PCR tests were repeatedly negative. The seroconversion could be detected during the second  
241 week post symptom onset (Figure 2). Presence of a seroconversion in a highly suspicious  
242 COVID-19 patient should be diagnostic in the right clinical settings. The utility of the testing  
243 before 2 weeks post symptom onset should be best decided on a case-by-case basis.

244 The overall agreement between SQ IgM/IgG and Wondfo Total was as high as 88.5%  
245 with Kappa of 0.75. The overall agreement between Abbott IgG and SQ IgG was as high as 94.6%  
246 with Kappa of 0.89. The disagreement cases were samples collected during the first 2 weeks of  
247 symptoms. Since the tests were generally not recommended before 2 weeks post symptom  
248 onset, the difference among the assays would not be clinically significant.

249

250 Specificities and cross-reactions of all four tests

251 It has been widely considered that the SARS-CoV-2 antibodies may be cross-reactive to  
252 seasonal coronaviruses, such as NL63, 229E, HKU1, and OC43. The latter two belong to beta  
253 subgroup which also includes SARS-CoV-2. The detection of non-COVID coronaviruses varies  
254 from year to year and in some years accounted for as much as 22%-25% of adult respiratory  
255 illness (13, 14). Therefore, if cross reactivity did exist, the utility of the SARS-CoV-2 antibody test  
256 would be greatly limited. In the current study, among the 21 samples from patients with  
257 coronaviruses NL63, HKU1 and 229E, 13 were collected at the time of diagnosis and 8 collected  
258 at least 2 weeks after the diagnosis to ensure sufficient development of immune response. All  
259 four tests performed well and none of them were reactive to the 21 samples in the study.  
260 Consistent with our findings, one study included 5 seasonal coronavirus samples and they were  
261 all negative by Abbott IgG (12). Seasonal coronaviruses are known for their short periods of  
262 immunity after infection. It is known that antibodies against seasonal coronaviruses reached  
263 peak titers in 2 weeks and slowly declined and the protection is largely lost a year later (15);  
264 however, due to repeat infection, a report found that adult population had a high  
265 seroprevalence of coronaviruses (91.3% for 229E, 59.2% for HKU1, 91.8% for NL63, and 90.8%  
266 for OC43) from a United States Metropolitan Population (11). In the current study we included  
267 over 1000 samples from pre-pandemic era and overall found very low positive rates in SQ IgM,  
268 SQ IgG and Abbott IgG, which echoes the findings from Abbott (10) and an independent study  
269 (16). The Wondfo Total was not tested in this evaluation. Given the high prevalence of  
270 coronavirus infection in the general population (11), if the cross-reactions were common, the  
271 positive rates would be expected to be higher.

272           The cross-reaction in hepatitis patients was unexpected. Out of 15 samples with  
273 hepatitis A, B or C, one sample with Hepatitis A IgG was positive in both the SQ IgG and Abbott  
274 tests. One sample with active Hepatitis B was positive by the Abbott IgG test. One sample with  
275 active Hepatitis B and C was positive by Wondfo test. It is difficult to determine which hepatitis  
276 antibody was indeed cross-reactive because all these samples were expected positive for  
277 Hepatitis A IgG and Hepatitis B surface antibodies.

278           Autoimmune antibodies are known interferences of many antibody tests. SQ IgM and  
279 Abbott IgG tests were reactive to a RF positive sample and Abbott IgG test was reactive to an  
280 anti-dsDNA positive sample. Special attention should be paid to autoimmune patients when  
281 interpreting their positive SARS-COVID-2 antibody results.

282

### 283 The clinical usefulness of IgM testing

284           The utility of SARS-COVID-2 IgM testing has not been fully evaluated. Reported  
285 specificities of IgM have been suboptimal: only 2 out of 9 tested assays achieved > 95% at the  
286 lower end of 95% confidence interval of their specificities (17). However, given the facts that SQ  
287 IgM detected IgM only 2 days before SQ IgG detected IgG and that SQ IgM positive rate was  
288 only 85.7% in samples over 2 weeks post symptom onset, SQ IgM has marked limit in its clinical  
289 utility.

290

### 291 Use of the antibody testing in community survey

292           Serologic testing has been used in seroprevalence surveys, including a large-scale  
293 geographic survey (18), a community level survey (19), and a special populations survey (20).

294 The key assay characteristic that impacts the accuracy of these surveys is specificity, especially  
295 when the disease prevalence is low. It is estimated that for an assay with 99% specificity, the  
296 positive predictive value is only ~50% in a disease with prevalence of 1%. The SQ IgG and  
297 Abbott IgG reached over 99% specificities at the lower ends of their 95% confidence intervals.  
298 The SQ IgG was negative in all the 1063 negative cases, with 99.64% specificity at the lower end  
299 of its 95% confidence interval. Even with 99.64% specificity, the positive predictive value  
300 increases to 74% in a disease with prevalence of 1%, and the positive predictive value increases  
301 to 93% in a disease with prevalence of 5%.

302

### 303 Limitation of the study

304 The main limitation of the study is that the samples from COVID-19 patients were  
305 collected from an inpatient population. This group of patients were generally overweight or  
306 obese (77%) with high prevalence of diabetes (40%). They tended to have a high D-Dimer levels  
307 and marked lymphocytopenia. The clinical symptoms tended to be severe with more being  
308 intubated and poor clinical outcomes. The antibody response in this population has been  
309 shown to be robust (17). In outpatient population, asymptomatic infected individuals have  
310 been reported only with ~ 10% (28/276) seropositive rates (20). Moreover, asymptomatic and  
311 pauci-symptomatic patients could have no detectable antibody response 4 weeks after the  
312 diagnosis (21). Another limitation is the limited number of non-COVID positive samples  
313 collected at least 2 weeks post symptom onset. More work is needed to assess these tests in  
314 this patient population.



315           Another important question in COVID-19 serology is how long the antibody response  
316 will persist. The three samples collected over 30 days post symptom onset had Abbott S/CO  
317 reading of 7.58 (31 days), 6.37 (31 days) and 2.43 (35 days). The last one was from a patient  
318 with end stage renal disease which is known for its attenuated immune response. The other  
319 two were among the most robust immune responses in this cohort (both over 90% quantile of  
320 S/CO readings). Obviously, follow-up testing of these patients' antibody S/CO levels will help to  
321 answer the question.

322           In summary, we validated three SARS-CoV-2 antibody tests, including two lateral flow  
323 assays (Wondfo Total Antibody and SQ IgM/IgG combo) and one chemiluminescent assay  
324 (Abbott IgG). All tests except SQ IgM performed well with excellent sensitivities two weeks after  
325 symptom onset and excellent overall specificities. Hepatitis and autoimmune samples were the  
326 main sources of very low interferences/cross-reactions.

327

328

329 Acknowledgements

330

331           The project was funded by Pathology Department of Lifespan Academic Center and  
332 Rhode Island Department of Health. The Pathology Department had no role in study design,  
333 data collection and interpretation, or the decision to submit the work for publication. Rhode  
334 Island Department of Health provided contracted fund to validate Abbott and SD Biosensor  
335 assays.

336           The authors claim no conflict of financial interest related to the project.

337           The authors want to acknowledge Drs. Angela Caliendo and Jonathon Kurtis to provide  
338 valuable feedbacks to the manuscript and the expertise to support the project.

339

340

341 **References**

- 342 1. Wu F, Zhao S, Yu B, Chen YM, Wang W, Song ZG, Hu Y, Tao ZW, Tian JH, Pei YY, Yuan ML,  
343 Zhang YL, Dai FH, Liu Y, Wang QM, Zheng JJ, Xu L, Holmes EC, Zhang YZ. 2020. A new  
344 coronavirus associated with human respiratory disease in China. *Nature* 579:265-269.
- 345 2. Wang W, Xu Y, Gao R, Lu R, Han K, Wu G, Tan W. 2020. Detection of SARS-CoV-2 in Different  
346 Types of Clinical Specimens. *JAMA* 323:1843–1844.
- 347 3. Li Y, Yao L, Li J, Chen L, Song Y, Cai Z, Yang C. 2020. Stability issues of RT-PCR testing of SARS-  
348 CoV-2 for hospitalized patients clinically diagnosed with COVID-19. *J Med Virol*  
349 26:10.1002/jmv.25786.
- 350 4. Guo L, Ren L, Yang S, Xiao M, Chang D, Yang F, Dela Cruz CS, Wang Y, Wu C, Xiao Y, Zhang L,  
351 Han L, Dang S, Xu Y, Yang Q, Xu S, Zhu H, Xu Y, Jin Q, Sharma L, Wang L, Wang J. 2020.  
352 Profiling Early Humoral Response to Diagnose Novel Coronavirus Disease (COVID-19). *Clin*  
353 *Infect Dis* ciaa310.
- 354 5. Zhao J, Yuan Q, Wang H, Liu W, Liao X, Su Y, Wang X, Yuan J, Li T, Li J, Qian S, Hong C, Wang F,  
355 Liu Y, Wang Z, He Q, Li Z, He B, Zhang T, Fu Y, Ge S, Liu L, Zhang J, Xia N, Zhang Z. 2020.  
356 Antibody responses to SARS-CoV-2 in patients of novel coronavirus disease 2019. *Clin Infect*  
357 *Dis* ciaa344.
- 358 6. Pan Y, Li X, Yang G, Fan J, Tang Y, Zhao J, Long X, Guo S, Zhao Z, Liu Y, Hu H, Xue H, Li Y. 2020.  
359 Serological immunochromatographic approach in diagnosis with SARS-CoV-2 infected  
360 COVID-19 patients. *J Infect* 10:S0163-4453(20)30175-4.

- 361 7. Burbelo PD, Riedo FX, Morishima C, Rawlings S, Smith D, Das S, Strich JR, Chertow DS, Davey  
362 RT, Cohen JI. 2020. Detection of Nucleocapsid Antibody to SARS-CoV-2 is More Sensitive  
363 than Antibody to Spike Protein in COVID-19 Patients. *J Infect Dis* jiaa273.
- 364 8. Wondfo. 2020. SARS-CoV-2 Antibody Test (Lateral Flow Method) package insert. Wondfo,  
365 Guangzhou, China.
- 366 9. SD Biosensor. 2020. STANDARD™ Q COVID-19 IgM/IgG Duo Test package insert. Gyeonggi-  
367 do, Korea.
- 368 10. Abbott. 2020. ARCHITECT SARS-CoV-2 IgG package insert. Abbott Diagnostics, Lake Forest, IL.
- 369 11. Severance EG, Bossis I, Dickerson FB, Stallings CR, Origoni AE, Sullens A, Yolken RH, Viscidi  
370 RP. 2008. Development of a nucleocapsid-based human coronavirus immunoassay and  
371 estimates of individuals exposed to coronavirus in a U.S. metropolitan population. *Clin*  
372 *Vaccine Immunol* 15:1805-1810
- 373 12. Tang MS, Hock KG, Logsdon NM, Hayes JE, Gronowski AM, Anderson NW, Farnsworth CW.  
374 2020. Clinical Performance of Two SARS-CoV-2 Serologic Assays. *Clin Chem* hvaa120.
- 375 13. Gorse GJ, Donovan MM, Patel GB. 2020. Antibodies to coronaviruses are higher in older  
376 compared with younger adults and binding antibodies are more sensitive than neutralizing  
377 antibodies in identifying coronavirus-associated illnesses. *J Med Virol* 92:512-517.
- 378 14. Ambrosioni J, Bridevaux PO, Wagner G, Mamin A, Kaiser L. 2014. Epidemiology of viral  
379 respiratory infections in a tertiary care centre in the era of molecular diagnosis, Geneva,  
380 Switzerland, 2011-2012. *Clin Microbiol Infect* 20:O578-O584.
- 381 15. Callow KA, Parry HF, Sergeant M, Tyrrell DA. 1990. The time course of the immune response  
382 to experimental coronavirus infection of man. *Epidemiol Infect* 105:435-46.

- 383 16. Bryan A, Pepper G, Wener MH, Fink SL, Morishima C, Chaudhary A, Jerome KR, Mathias PC,  
384 Greninger AL. 2020. Performance Characteristics of the Abbott Architect SARS-CoV-2 IgG  
385 Assay and Seroprevalence in Boise, Idaho. J Clin Microbiol JCM.00941-20.
- 386 17. Whitman JD, Hiatt J, Mowery CT, Shy BR, Yu Y, Yamamoto TN, Rathore U, Goldgof GM,  
387 Whitty C, Woo JM, Gallman AE, Miller TE, Levine AG, Nguyen DN, Bapat SP, Balcerek J,  
388 Bylsma S, Lyons AM, Li S, Wong AW, Gillis-Buck EM, Steinhart ZB, Lee Y, Apathy R, Lipke MJ,  
389 Smith JA, ZhengT, Boothby IC, Isaza E, Chan J, Acenas DD, Lee J, Macrae TA, Kyaw TS, Wu D,  
390 Ng DL, Gu W, York VA, Eskandarian HA, Callaway PC, Warriar L, Moreno ME, Levan J, Torres L,  
391 Farrington L, Loudermilk R, Koshal K, Zorn KC, Garcia-Beltran WF, Yang D, Astudillo MG,  
392 Bernstein BE, Gelfand JA, Ryan ET, Charles RC, Iafrate AJ, Lennerz JK, Miller S, Chiu CY,  
393 Stramer SL, Wilson MR, Manglik A, Ye CJ, Krogan NJ, Anderson MS, Cyster JG, Ernst JD, Wu  
394 AHB, Lynch KL, Bern C, Hsu PD, Marson A. 2020 Test performance evaluation of SARS-CoV-2  
395 serological assays medRxiv <https://doi.org/10.1101/2020.04.25.20074856>
- 396 18. de Lusignan S, Lopez Bernal J, Zambon M, Akinyemi O, Amirthalingam G, Andrews N,  
397 Borrow R, Byford R, Charlett A, Dabrera G, Ellis J, Elliot AJ, Feher M, Ferreira F, Krajenbrink E,  
398 Leach J, Linley E, Liyanage H, Okusi C, Ramsay M, Smith G, Sherlock J, Thomas N, Tripathy M,  
399 Williams J, Howsam G, Joy M, Hobbs R. 2020. Emergence of a Novel Coronavirus (COVID-19):  
400 Protocol for Extending Surveillance Used by the Royal College of General Practitioners  
401 Research and Surveillance Centre and Public Health England. JMIR Public Health Surveill.  
402 2020 6:e18606.

- 403 19. Pulia MS, O'Brien TP, Hou PC, Schuman A, Sambursky R. 2020. Multi-tiered screening and  
404 diagnosis strategy for COVID-19: a model for sustainable testing capacity in response to  
405 pandemic. *Ann Med* 14:1-8.
- 406 20. Zhao R, Li M, Song H, Chen J, Ren W, Feng Y, Gao GF, Song J, Peng Y, Su B, Guo X, Wang Y,  
407 Chen J, Li J, Sun H, Bai Z, Cao W, Zhu J, Zhang Q, Sun Y, Sun S, Mao X, Su J, Chen X, He A, Gao  
408 W, Jin R, Jiang Y, Sun L. 2020. Early detection of SARS-CoV-2 antibodies in COVID-19 patients  
409 as a serologic marker of infection. *Clin Infect Dis* ciaa523.
- 410 21. Yongchen Z, Shen H, Wang X, Shi X, Li Y, Yan J, Chen Y, Gu B. 2020. Different longitudinal  
411 patterns of nucleic acid and serology testing results based on disease severity of COVID-19  
412 patients. *Emerg Microbes Infect* 9:833-836.
- 413  
414  
415

416 **Figure legend**

417

418 **Figure 1.** Positive rates of four tests based on symptom onset days

419 SQ IgM: STANDARD Q COVID-19 IgM (SD BIOSENSOR); SQ IgG: STANDARD Q COVID-19 IgG (SD  
420 BIOSENSOR); Wondfo Total: SARS-CoV-2 Total Antibody Test (Wondfo).

421

422 **Figure 2.** Average seroconversion days detected by four tests.

423 SEM: standard error of mean

424

425

426 **Table 1.** Clinicopathologic parameters of the COVID-19 patients.

| Patient cases                                                | Total               | Male                | Female      | P-value             |
|--------------------------------------------------------------|---------------------|---------------------|-------------|---------------------|
| Sex                                                          | 71                  | 42 (59%)            | 29 (41%)    |                     |
| Age (Mean ± SEM)                                             | 59.5 ± 1.9          | 56.2 ± 1.9          | 64.3 ± 3.4  | 0.0470              |
| Race                                                         |                     |                     |             | 0.2390              |
| White or Caucasian                                           | 38 (33%)            | 20 (28%)            | 18 (25%)    |                     |
| Hispanic or Latino                                           | 22 (31%)            | 16 (23%)            | 6 (8%)      |                     |
| African American                                             | 10 (14%)            | 6 (8%)              | 4 (6%)      |                     |
| Asian                                                        | 1 (1%)              | 0                   | 1 (1%)      |                     |
| BMI                                                          |                     |                     |             | 0.4779              |
| Normal                                                       | 16 (23%)            | 10 (14%)            | 6 (9%)      |                     |
| Overweight                                                   | 21 (30%)            | 10 (14%)            | 11 (16%)    |                     |
| Obese                                                        | 33 (47%)            | 21 (30%)            | 12 (17%)    |                     |
| Dwelling                                                     |                     |                     |             | 0.7017              |
| With family members                                          | 48 (68%)            | 27 (38%)            | 21 (30%)    |                     |
| Assisted living                                              | 9 (13%)             | 5 (7%)              | 4 (6%)      |                     |
| Alone                                                        | 9 (13%)             | 6 (9%)              | 3 (4%)      |                     |
| Homeless                                                     | 5 (7%)              | 4 (6%)              | 1 (1%)      |                     |
| Symptom onset day when blood drawn<br>Mean ± SEM             | 11.2 ± 0.92         | 10.2 ± 1.1          | 12.7 ± 1.6  | 0.2010              |
| Diabetes                                                     |                     |                     |             | 0.2258              |
| Yes                                                          | 28 (40%)            | 19 (27%)            | 9 (13%)     |                     |
| No                                                           | 43 (61%)            | 23 (32%)            | 20 (28%)    |                     |
| Base line lung disease                                       |                     |                     |             | 1.0000              |
| Yes <sup>s</sup>                                             | 8 (11%)             | 5 (7%)              | 4 (6%)      |                     |
| No                                                           | 63 (87%)            | 37 (52%)            | 25 (35%)    |                     |
| Respiratory Pathogen Panel                                   |                     |                     |             | 1.0000              |
| Positive                                                     | 6 (9%) <sup>q</sup> | 4 (6%) <sup>y</sup> | 2 (3%)      |                     |
| Negative                                                     | 55 (91%)            | 38 (53%)            | 27 (38%)    |                     |
| Absolute lymphocyte count (10 <sup>9</sup> /L)<br>Mean ± SEM | 0.71 ± 0.06         | 0.62 ± 0.05         | 0.84 ± 0.14 | 0.1287              |
| D-Dimer (ng/mL)                                              |                     |                     |             | 0.0289 <sup>z</sup> |
| Median                                                       | 850                 | 2180                | 431         |                     |
| 95% Quantiles                                                | (103, 59640)        | (104, 59640)        | (103, 2669) |                     |
| Mean ± SEM <sup>†</sup>                                      | 7.0 ± 0.25          | 7.4 ± 0.33          | 6.3 ± 0.27  | 0.0099              |
| Highest level of treatment                                   |                     |                     |             | 0.1887              |
| Room air                                                     | 17 (26%)            | 11 (16%)            | 7 (10%)     |                     |
| Nasal cannula                                                | 32 (45%)            | 15 (21%)            | 17 (24%)    |                     |
| Intubation                                                   | 19 (27%)            | 14 (20%)            | 5 (7%)      |                     |
| Extracorporeal membrane oxygenation                          | 1 (1%)              | 1 (1%)              | 0           |                     |
| Outcome                                                      |                     |                     |             | 0.2277              |
| Deceased                                                     | 7 (10%)             | 6 (8%)              | 1 (1%)      |                     |
| Survived                                                     | 64 (90%)            | 36 (51%)            | 28 (39%)    |                     |



- 427 § Asthma and/or chronic obstructive pulmonary disease (COPD)
- 428 q Positives included: Coronavirus NL63, Coronavirus OC43, Rhinovirus/Enterovirus
- 429 y Positives included: H1N1, Respiratory syncytial virus A and B
- 430 ‡ After natural logarithmic transformation
- 431 ¥ Non-parametric (Wilcoxon) test
- 432 SEM: Standard error of mean
- 433

434 **Table 2.** Performance comparisons of 4 assays in COVID-19 patients.

| Sample number                                            |     | SQ IgM/IgG <sup>#</sup> |                       | Total |
|----------------------------------------------------------|-----|-------------------------|-----------------------|-------|
|                                                          |     | Pos                     | Neg                   |       |
| Wondfo                                                   | Pos | 65 (58%)                | 6 <sup>§</sup> (5.3%) | 71    |
| Total Ab                                                 | Neg | 7 <sup>q</sup> (6.2%)   | 35 (31%)              | 42    |
| Total                                                    |     | 72                      | 41                    | 113   |
| % overall agreement (95% CI): 88.5 (81.3, 93.5)          |     |                         |                       |       |
| % positive percent agreement (95% CI): 90.3 (81.3, 95.2) |     |                         |                       |       |
| % negative percent agreement (95% CI): 85.4 (71.6, 93.1) |     |                         |                       |       |
| Kappa value (95% CI): 0.75 (0.62-0.88)                   |     |                         |                       |       |
| Sample number                                            |     | SQ IgG                  |                       | Total |
|                                                          |     | Pos                     | Neg                   |       |
| Abbott IgG                                               | Pos | 58 (52%)                | 5 <sup>y</sup> (4.5%) | 63    |
|                                                          | Neg | 1 <sup>‡</sup> (1%)     | 48 (43%)              | 49    |
| Total                                                    |     | 59                      | 53 (42.9)             | 112   |
| % overall agreement (95% CI): 94.6 (88.8, 97.5)          |     |                         |                       |       |
| % positive percent agreement (95% CI): 98.3 (91, 99.7)   |     |                         |                       |       |
| % negative percent agreement (95% CI): 90.6 (79.7, 95.9) |     |                         |                       |       |
| Kappa value (95% CI): 0.89 (0.81-0.98)                   |     |                         |                       |       |

435 #: Either IgM or IgG positive is considered as positive

436 §: Abbott IgG is positive in 3 of 6; SQ IgG is all negative.

437 q: Abbott IgG is positive in 3; SQ IgG is positive in 4

438 y: SQ IgM is positive in 1; Wondfo Total is positive in 4

439 ‡: SQ IgM is positive; Wondfo Total is negative

440 CI: confidence interval

441

442 **Table 3.** Positive rates of four assays on negative samples and interferences/cross-reactions

| Assay names                                    | SQ IgM                          | SQ IgG                        | Abbott IgG                    | Wondfo Total                  |
|------------------------------------------------|---------------------------------|-------------------------------|-------------------------------|-------------------------------|
| Random non-COVID-19 samples (early March 2020) | <b><u>3/126<sup>a</sup></u></b> | 0/126                         | 0/125                         | 0/126                         |
| Specificity (95% confidence interval)          | 97.6% (93.2%, 99.2%)            | 100% (97.0%, 100%)            | 100% (97.0%, 100%)            | 100% (97.0%, 100%)            |
| Positivity in non-COVID-19 samples with        |                                 |                               |                               |                               |
| Coronavirus NL63 <sup>b</sup>                  | 0/11                            | 0/10                          | 0/11                          | 0/11                          |
| Coronavirus HKU1 <sup>c</sup>                  | 0/7                             | 0/6                           | 0/7                           | 0/7                           |
| Coronavirus 229E <sup>d</sup>                  | 0/3                             | 0/3                           | 0/3                           | 0/3                           |
| Influenza A <sup>e</sup>                       | 0/4                             | 0/4                           | 0/4                           | 0/4                           |
| Influenza A Subtype 2009 H1N1 <sup>f</sup>     | 0/6                             | 0/6                           | 0/6                           | 0/6                           |
| Influenza A subtype H3 <sup>g</sup>            | 0/1                             | 0/1                           | 0/1                           | 0/1                           |
| Influenza B <sup>h</sup>                       | 0/2                             | 0/2                           | 0/2                           | 0/2                           |
| Human Metapneumovirus <sup>i</sup>             | 0/4                             | 0/4                           | 0/4                           | 0/4                           |
| Human Rhinovirus/Enterovirus <sup>j</sup>      | 0/5                             | 0/5                           | 0/5                           | 0/5                           |
| Respiratory syncytial virus A <sup>k</sup>     | 0/2                             | 0/2                           | 0/2                           | 0/2                           |
| Respiratory syncytial virus B <sup>l</sup>     | 0/1                             | 0/1                           | 0/1                           | 0/1                           |
| Adenovirus <sup>m</sup>                        | 0/2                             | 0/2                           | 0/2                           | 0/2                           |
| Varicella zoster virus IgG                     | 0/4                             | 0/4                           | 0/4                           | 0/5                           |
| Rubella IgG                                    | <b><u>1/5<sup>n</sup></u></b>   | 0/5                           | 0/5                           | 0/5                           |
| Toxoplasma IgM                                 | <b><u>1/1<sup>o</sup></u></b>   | 0/1                           | 0/1                           | 0/1                           |
| Toxoplasma IgG                                 | 0/2                             | 0/2                           | 0/2                           | 0/2                           |
| EBV IgG                                        | 0/4                             | 0/4                           | 0/4                           | 0/4                           |
| EGV IgM                                        | 0/5                             | 0/5                           | 0/5                           | 0/5                           |
| CMV IgG                                        | 0/5                             | 0/5                           | 0/5                           | 0/5                           |
| CMV IgM                                        | 0/1                             | <b><u>1/1<sup>p</sup></u></b> | 0/1                           | 0/1                           |
| CMV IgM & Rheumatoid Factor (RF)               | 0/1                             | 0/1                           | 0/1                           | 0/1                           |
| Hepatitis A IgG                                | 0/3                             | <b><u>1/3<sup>p</sup></u></b> | <b><u>1/3<sup>p</sup></u></b> | 0/3                           |
| Hepatitis B                                    | 0/5                             | 0/5                           | <b><u>1/5<sup>q</sup></u></b> | 0/5                           |
| Hepatitis C                                    | 0/6                             | 0/6                           | 0/6                           | 0/6                           |
| Hepatitis B&C                                  | 0/1                             | 0/1                           | 0/1                           | <b><u>1/1<sup>r</sup></u></b> |
| Rapid Plasma Reagin (RPR)                      | 0/5                             | 0/5                           | 0/5                           | 0/5                           |
| Rheumatoid Factor (RF)                         | <b><u>1/3<sup>s</sup></u></b>   | 0/3                           | <b><u>1/3<sup>s</sup></u></b> | 0/3                           |
| Anti-dsDNA                                     | 0/5                             | 0/5                           | <b><u>1/5<sup>t</sup></u></b> | 0/5                           |
| Antinuclear antibody (ANA) <sup>u</sup>        | 0/5                             | 0/5                           | 0/5                           | 0/5                           |
| Paraprotein IgG type                           | 0/5                             | 0/5                           | 0/5                           | 0/5                           |
| Paraprotein IgM type                           | 0/4                             | 0/4                           | 0/4                           | 0/4                           |
| Total samples                                  | <b><u>3/118</u></b>             | <b><u>2/116</u></b>           | <b><u>4/118</u></b>           | <b><u>1/119</u></b>           |

443 a: Two of the three cases was followed up clinically (44 and 61 days after blood collection). COVID-19 was not  
444 developed.

445 b: blood collected 0 (x3), 1, 9, 31, 33, 35 (x2), 36, and 53 days post PCR diagnosis.

446 c: blood collected 0, 3 (x2), 3, 4, 9, 14, and 34 days post PCR diagnosis

447 d: blood collected 0, 8, and 9 days post PCR Diagnosis

448 e: blood collected 0, 2, 3, and 4 days post PCR diagnosis

449 f: blood collected 0 (x3), 1, 6, and 14 days post PCR diagnosis

450 g: blood collected 33 days post PCR diagnosis

451 h: blood collected 35 and 41 days post PCR diagnosis.

452 i: Blood collected 0 (x3), 2, and 46 days post PCR diagnosis  
453 j: blood collected 0 (x3), 20, and 52 days post PCR diagnosis  
454 k: blood collected 1 and 42 days post PCR diagnosis.  
455 l: blood collected 38 days post PCR diagnosis  
456 m: blood collected 0 and 23 days post PCR diagnosis  
457 n: No COVID-19 was developed on the positive case at 20 days follow-up.  
458 o: No COVID-19 was developed on the positive case at 21 days follow-up.  
459 p: No follow-up was available on the positive case  
460 q: No COVID-19 was developed on the positive case at 38 days follow-up.  
461 r: No COVID-19 was developed on the positive case at 17 days follow-up.  
462 s: No COVID-19 was developed on the positive case at 18 days follow-up.  
463 t: No COVID-19 was developed on the positive case at 22 days follow-up.  
464 u: ANA titers: 1:320, 1:640, 1:1280 (x2), 1:5120  
465  
466

467 **Table 4.** Positive rate in pre-pandemic and post-pandemic samples for 3 assays

| Assay names                                                   | SQ IgM                  | SQ IgG              | Abbott IgG              |
|---------------------------------------------------------------|-------------------------|---------------------|-------------------------|
| Random non-COVID-19 samples (early March 2020) (from Table 3) | <b><u>3/126</u></b>     | 0/126               | 0/125                   |
| Pre-pandemic samples from troponin study                      | <b><u>6/500</u></b>     | 0/500               | <b><u>4/498</u></b>     |
| Pre-pandemic samples from transfusion service                 | 0/50                    | 0/50                | 0/50                    |
| Pre-pandemic samples from Rhode Island Blood Center           | <b><u>2/21</u></b>      | 0/21                | 0/21                    |
| Pre-pandemic samples from prenatal samples                    | <b><u>1/371</u></b>     | 0/371               | 0/371                   |
| Total                                                         | <b><u>12/1063</u></b>   | 0/1063              | <b><u>4/1059</u></b>    |
| Specificity (95% confidence interval)                         | 98.87% (98.04%, 99.35%) | 100% (99.64%, 100%) | 99.62% (99.03%, 99.85%) |

468

469

470

471 **Supplemental Table 1. Seroconversions detected by four tests.**

| Patient ID | Symptom onset | SQ IgM | SQ IgG | Abbott IgG | Wondfo Total |
|------------|---------------|--------|--------|------------|--------------|
| 17         | Day 4         | Neg    | Neg    | Neg        | Neg          |
|            | Day 7         | Pos    | Pos    | Pos        | Pos          |
| 9          | Day 10        | Neg    | Pos    | Pos        | Pos          |
|            | Day 12        | Pos    | Pos    | Pos        | Pos          |
| 14         | Day 5         | Pos    | Pos    | Neg        | Neg          |
|            | Day 7         | Pos    | Pos    | Pos        | Neg          |
| 19         | Day 10        | Neg    | Neg    | Neg        | Neg          |
|            | Day 11        | Neg    | Neg    | Pos        | Pos          |
| 30         | Day 10        | Pos    | Pos    | Pos        | Neg          |
|            | Day 12        | Pos    | Pos    | Pos        | Pos          |
| 36         | Day 5         | Neg    | Neg    | Neg        | Neg          |
|            | Day 9         | Pos    | Pos    | Neg        | Pos          |
| 42         | Day 9         | Neg    | Neg    | Neg        | Neg          |
|            | Day 11        | Pos    | Pos    | Pos        | Neg          |
| 46         | Day 9         | Neg    | Neg    | Neg        | Neg          |
|            | Day 13        | Neg    | Neg    | Neg        | Pos          |
| 51         | Day 8         | Pos    | Neg    | Neg        | Pos          |
|            | Day 9         | Pos    | Pos    | Pos        | Pos          |
| 69         | Day 5         | Neg    | Neg    | Neg        | Neg          |
|            | Day 10        | Pos    | Pos    | Pos        | Pos          |
| 72         | Day 7         | Neg    | Neg    | Neg        | Neg          |
|            | Day 8         | Neg    | Neg    | Neg        | Pos          |
| 75         | Day 5         | Neg    | Neg    | Neg        | Neg          |
|            | Day 10        | Pos    | Pos    | Pos        | Pos          |
| 78         | Day 4         | Pos    | Neg    | Neg        | Neg          |
|            | Day 7         | Pos    | Pos    | Pos        | Pos          |
| 83         | Day 17        | Pos    | Pos    | Pos        | Pos          |
|            | Day 25        | Neg    | Pos    | Pos        | Pos          |
| 85         | Day 8         | Neg    | Neg    | Pos        | Pos          |
|            | Day 9         | Neg    | Pos    | Pos        | Pos          |
| 86         | Day 12        | Neg    | Pos    | Pos        | Pos          |
|            | Day 26        | Neg    | Pos    | Pos        | Pos          |
| 90         | Day 7         | Neg    | Neg    | Neg        | Neg          |
|            | Day 9         | Pos    | Neg    | Neg        | Pos          |

472

473

474

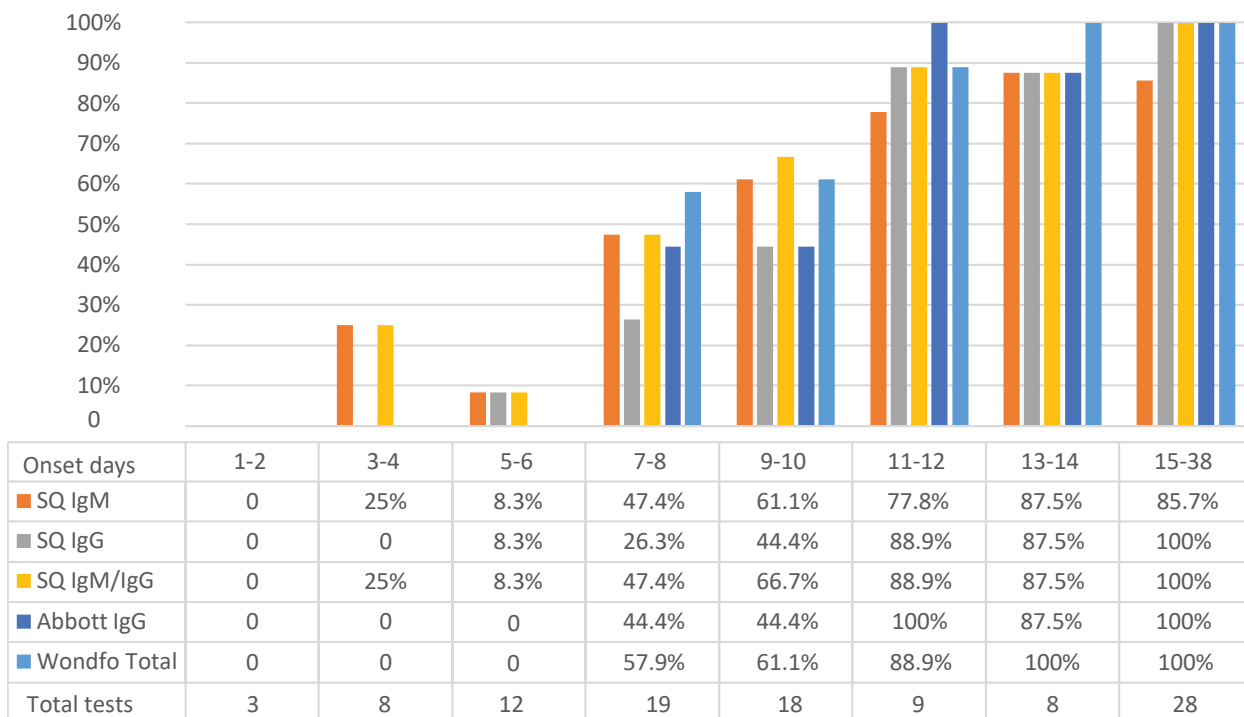

475

476

477 Figure 1. Positive rates of four tests based on symptom onset days.

478 SQ IgM: STANDARD Q COVID-19 IgM (SD BIOSENSOR); SQ IgG: STANDARD Q COVID-19 IgG (SD

479 BIOSENSOR); Wondfo Total: SARS-CoV-2 Total antibody test (Wondfo).

480

481

482

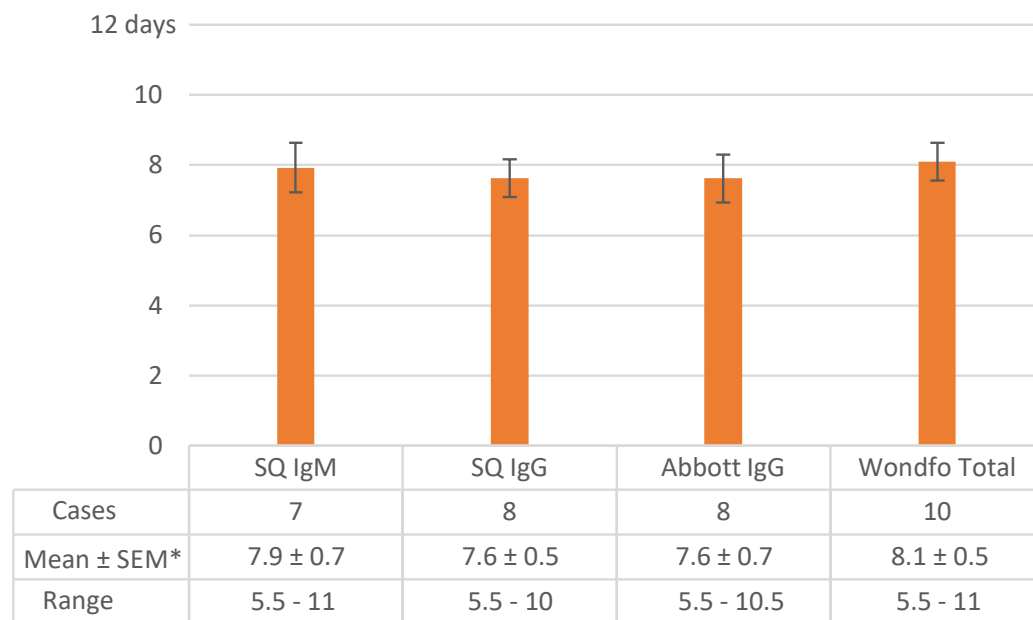

\*P = 0.9365

483

484

485 Figure 2. Average seroconversion days detected by four tests.

486 SEM: standard error of mean

487



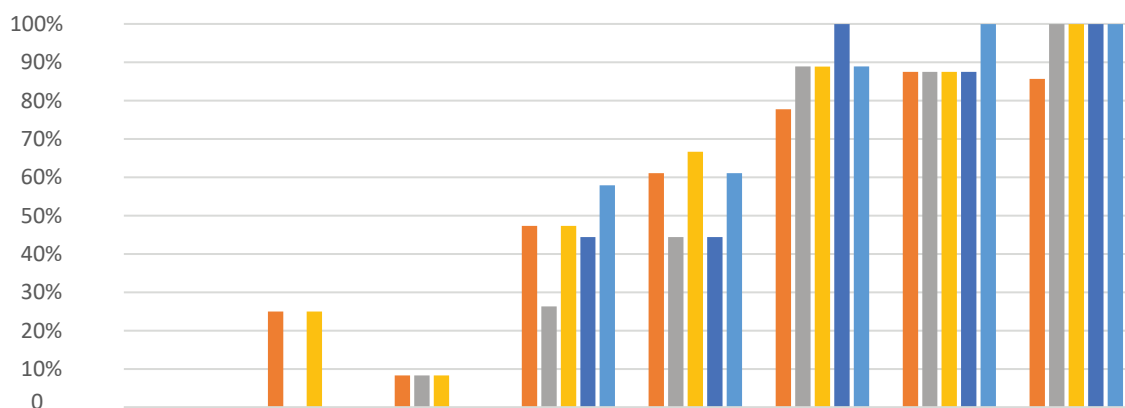

| Onset days     | 1-2 | 3-4 | 5-6  | 7-8   | 9-10  | 11-12 | 13-14 | 15-38 |
|----------------|-----|-----|------|-------|-------|-------|-------|-------|
| ■ SQ IgM       | 0   | 25% | 8.3% | 47.4% | 61.1% | 77.8% | 87.5% | 85.7% |
| ■ SQ IgG       | 0   | 0   | 8.3% | 26.3% | 44.4% | 88.9% | 87.5% | 100%  |
| ■ SQ IgM/IgG   | 0   | 25% | 8.3% | 47.4% | 66.7% | 88.9% | 87.5% | 100%  |
| ■ Abbott IgG   | 0   | 0   | 0    | 44.4% | 44.4% | 100%  | 87.5% | 100%  |
| ■ Wondfo Total | 0   | 0   | 0    | 57.9% | 61.1% | 88.9% | 100%  | 100%  |
| Total tests    | 3   | 8   | 12   | 19    | 18    | 9     | 8     | 28    |

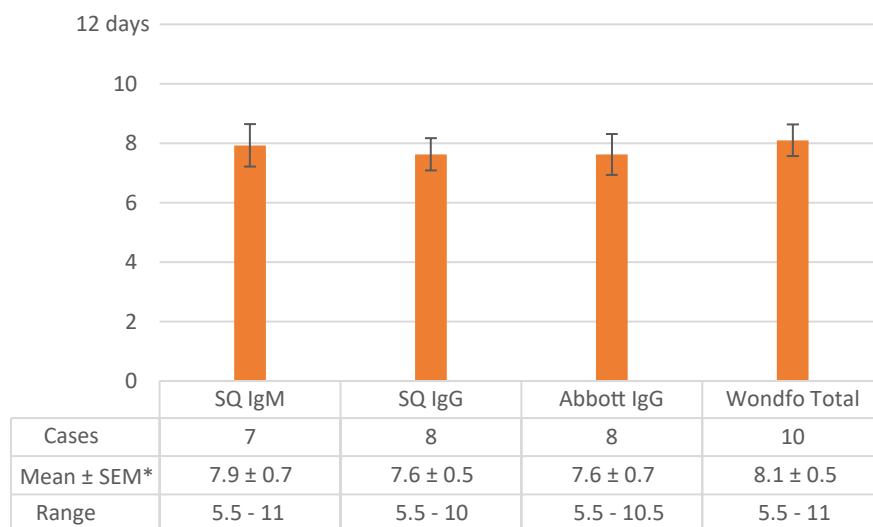

\*P = 0.9365
